# Supplementary material for: Anxiety in Parkinson’s Disease: A Systematic Review of Neuroimaging Studies
Source: Atypon-hosted journal article supplement (doi:10.1176/appi.neuropsych.20110272), 2021-07-19
Supplement: appi.neuropsych.20110272.ds001.pdf [file appi.neuropsych.20110272.ds001.pdf]

Supplementary Table S1. Search Strategy

**PubMed (72 results):**

"Parkinson Disease"[Mesh] OR "Parkinson disease"[tiab] OR "parkinsons disease"[tiab] OR Parkinsonism[tiab]  
OR "Paralysis Agitans"[tiab]

AND

"Anxiety"[Mesh] OR "Anxiety Disorders"[Mesh] OR anxious\*[tiab] OR anxiety[tiab] OR nervousness[tiab] OR  
"emotional processing"[tiab] OR "emotion recognition"[tiab]

AND

"magnetic resonance imaging"[tiab] OR mri\*[tiab] OR "Magnetic Resonance Imaging"[Mesh] OR fmri\*[tiab]  
OR functional mri\*[tiab] OR "functional magnetic resonance imaging"[tiab] OR dti[tiab] OR "diffusion tensor  
imaging"[tiab] OR "diffusion tractography"[tiab] OR "Diffusion Tensor Imaging"[Mesh]

<https://www.ncbi.nlm.nih.gov/sites/myncbi/1vqupdogrvf/collections/58675859/public/>

**Embase (621)**

('Parkinson disease'/exp) OR ("Parkinson disease" OR "parkinsons disease" OR Parkinsonism OR "Paralysis  
Agitan\*"):ti,ab

AND

('anxiety'/exp) OR ('anxiety disorder'/exp) OR (anxious\* OR anxiety OR nervousness OR "emotional  
processing" OR "emotion recognition"):ti,ab

AND

('nuclear magnetic resonance imaging'/exp) OR 'diffusion tensor imaging'/exp  
OR ("magnetic resonance imaging" OR mri\* OR fmri\* OR "functional mri\*" OR "functional magnetic resonance  
imaging" OR dti OR "diffusion tensor imaging" OR "diffusion tractography"):ti,ab

**PsycINFO (102 results)**

(DE "Parkinson's Disease" OR DE "Parkinsonism") OR "Parkinson disease" OR "parkinsons disease" OR  
Parkinsonism OR "Paralysis Agitan\*"

AND

(DE "Anxiety" OR DE "Anxiety Disorders" OR DE "Castration Anxiety" OR DE "Death Anxiety" OR DE  
"Generalized Anxiety Disorder" OR DE "Obsessive Compulsive Disorder" OR DE "Panic Attack" OR DE "Panic  
Disorder" OR DE "Phobias" OR DE "Separation Anxiety Disorder" OR DE "Trichotillomania" ) OR anxious\* OR  
anxiety OR nervousness OR "emotional processing" OR "emotion recognition"

AND

(DE "Magnetic Resonance Imaging" OR DE "Diffusion Tensor Imaging" OR DE "Functional Magnetic Resonance  
Imaging" ) OR "magnetic resonance imaging" OR mri\* OR fmri\* OR "functional mri\*" OR "functional magnetic  
resonance imaging" OR dti OR "diffusion tensor imaging" OR "diffusion tractography"

**Web of Science (62)**

TS=("Parkinson disease" OR "parkinsons disease" OR Parkinsonism OR "Paralysis Agitan\*")

AND

TS=(anxious\* OR anxiety OR nervousness OR "emotional processing" OR "emotion recognition")

AND

TS=("magnetic resonance imaging" OR mri\* OR fmri\* OR "functional mri\*" OR "functional magnetic resonance imaging" OR dti OR "diffusion tensor imaging" OR "diffusion tractography")

**Cochrane (TBD)**

"Parkinson Disease"[Mesh] OR "Parkinson disease"[tiab] OR "parkinsons disease"[tiab] OR Parkinsonism[tiab] OR "Paralysis Agitans"[tiab]

AND

"Anxiety"[Mesh] OR "Anxiety Disorders"[Mesh] OR anxious\*[tiab] OR anxiety[tiab] OR nervousness[tiab] OR "emotional processing"[tiab] OR "emotion recognition"[tiab]

AND

"Magnetic Resonance Imaging"[Mesh] OR "Diffusion Tensor Imaging"[Mesh] OR "magnetic resonance imaging"[tiab] OR mri\*[tiab] OR fmri\*[tiab] OR functional mri\*[tiab] OR "functional magnetic resonance imaging"[tiab] OR dti[tiab] OR "diffusion tensor imaging"[tiab] OR "diffusion tractography"[tiab]
